# Supplementary material for: Partial Least Squares Discriminant Analysis and Bayesian Networks for Metabolomic Prediction of Childhood Asthma
Source: MDPI journal article supplement (doi:10.3390/metabo8040068), 2018-10-23
Supplement: s1 [file s1]

## Supplementary Material

**Table S1: Super Pathway and Sub Pathway of 433 Metabolites included in the analyses**

| <b>Super Pathway</b> | <b>Sub Pathway</b>                               | <b>n</b> | <b>%</b> |
|----------------------|--------------------------------------------------|----------|----------|
| Lipids               | Fatty Acid Metabolism                            | 39       | 9.00%    |
| Lipids               | Sphingolipid Metabolism                          | 25       | 5.80%    |
| Lipids               | Fatty Acid                                       | 22       | 5.10%    |
| Lipids               | Secondary Bile Acid Metabolism                   | 12       | 2.80%    |
| Lipids               | Primary Bile Acid Metabolism                     | 8        | 1.80%    |
| Lipids               | Phospholipid Metabolism                          | 7        | 1.60%    |
| Lipids               | Endocannabinoid                                  | 5        | 1.20%    |
| Lipids               | Sterol                                           | 4        | 0.90%    |
| Lipids               | Androgenic Steroids                              | 3        | 0.70%    |
| Lipids               | Medium Chain Fatty Acid                          | 3        | 0.70%    |
| Lipids               | Carnitine Metabolism                             | 2        | 0.50%    |
| Lipids               | Corticosteroids                                  | 2        | 0.50%    |
| Lipids               | Glycerolipid Metabolism                          | 2        | 0.50%    |
| Lipids               | Monoacylglycerol                                 | 2        | 0.50%    |
| Lipids               | Progestin Steroids                               | 2        | 0.50%    |
| Lipids               | Fatty Acid Synthesis                             | 1        | 0.20%    |
| Lipids               | Inositol Metabolism                              | 1        | 0.20%    |
| Lipids               | Ketone Bodies                                    | 1        | 0.20%    |
| Lipids               | Mevalonate Metabolism                            | 1        | 0.20%    |
| Amino Acid           | Leucine, Isoleucine and Valine Metabolism        | 26       | 6.00%    |
| Amino Acid           | Tyrosine Metabolism                              | 16       | 3.70%    |
| Amino Acid           | Urea cycle; Arginine and Proline Metabolism      | 16       | 3.70%    |
| Amino Acid           | Tryptophan Metabolism                            | 14       | 3.20%    |
| Amino Acid           | Methionine, Cysteine, SAM and Taurine Metabolism | 12       | 2.80%    |
| Amino Acid           | Glycine, Serine and Threonine Metabolism         | 9        | 2.10%    |
| Amino Acid           | Histidine Metabolism                             | 9        | 2.10%    |
| Amino Acid           | Glutamate Metabolism                             | 8        | 1.80%    |
| Amino Acid           | Lysine Metabolism                                | 8        | 1.80%    |
| Amino Acid           | Alanine and Aspartate Metabolism                 | 5        | 1.20%    |
| Amino Acid           | Glutathione Metabolism                           | 5        | 1.20%    |
| Amino Acid           | Polyamine Metabolism                             | 5        | 1.20%    |
| Amino Acid           | Phenylalanine Metabolism                         | 4        | 0.90%    |
| Amino Acid           | Creatine Metabolism                              | 3        | 0.70%    |
| Amino Acid           | Guanidino and Acetamido Metabolism               | 1        | 0.20%    |

**Supplementary Table 1: *cont***

| <b>Super Pathway</b>   | <b>Sub Pathway</b>                                   | <b>n</b> | <b>%</b> |
|------------------------|------------------------------------------------------|----------|----------|
| Xenobiotics            | Food Component/Plant                                 | 23       | 5.30%    |
| Xenobiotics            | Benzoate Metabolism                                  | 16       | 3.70%    |
| Xenobiotics            | Chemical                                             | 13       | 3.00%    |
| Xenobiotics            | Bacterial/Fungal                                     | 2        | 0.50%    |
| Xenobiotics            | Xanthine Metabolism                                  | 2        | 0.50%    |
| Xenobiotics            | Drug                                                 | 1        | 0.20%    |
| Nucleotide             | Pyrimidine Metabolism, Cytidine containing           | 14       | 3.20%    |
| Nucleotide             | Purine Metabolism                                    | 13       | 3.00%    |
| Peptide                | Gamma-glutamyl Amino Acid                            | 15       | 3.50%    |
| Peptide                | Dipeptide                                            | 4        | 0.90%    |
| Peptide                | Acetylated Peptides                                  | 3        | 0.70%    |
| Cofactors and Vitamins | Hemoglobin and Porphyrin Metabolism                  | 5        | 1.20%    |
| Cofactors and Vitamins | Nicotinate and Nicotinamide Metabolism               | 5        | 1.20%    |
| Cofactors and Vitamins | Tocopherol Metabolism                                | 4        | 0.90%    |
| Cofactors and Vitamins | Ascorbate and Aldarate Metabolism                    | 3        | 0.70%    |
| Cofactors and Vitamins | Pantothenate and CoA Metabolism                      | 1        | 0.20%    |
| Cofactors and Vitamins | Vitamin A Metabolism                                 | 1        | 0.20%    |
| Cofactors and Vitamins | Vitamin B6 Metabolism                                | 1        | 0.20%    |
| Carbohydrate           | Glycolysis, Gluconeogenesis, and Pyruvate Metabolism | 6        | 1.40%    |
| Carbohydrate           | Pentose Metabolism                                   | 5        | 1.20%    |
| Carbohydrate           | Fructose, Mannose and Galactose Metabolism           | 3        | 0.70%    |
| Carbohydrate           | Aminosugar Metabolism                                | 2        | 0.50%    |
| Carbohydrate           | Glycogen Metabolism                                  | 2        | 0.50%    |
| Energy                 | TCA Cycle                                            | 5        | 1.20%    |
| Energy                 | Oxidative Phosphorylation                            | 1        | 0.20%    |

**Table S2: Edge Weights between a pair of nodes in the BayesNet**

| Source Node                           | Sink Node                             | Edge Weight |
|---------------------------------------|---------------------------------------|-------------|
| methyl glucopyranoside (alpha + beta) | N-methylproline                       | 228.9       |
| CMP                                   | guanosine                             | 168.14      |
| 1-methylhistidine                     | 3-methylhistidine                     | 95.72       |
| beta-cryptoxanthin                    | methyl glucopyranoside (alpha + beta) | 88.63       |
| aspartate                             | ergothioneine                         | 81.13       |
| 4-hydroxyhippurate                    | 3-(3-hydroxyphenyl)propionate         | 80.26       |
| pyrraline                             | 2,3-dihydroxyisovalerate              | 72.58       |
| <b>Asthma</b>                         | glycerophosphoinositol                | 70.41       |
| guanosine                             | glycerophosphoinositol                | 59.26       |
| N-delta-acetylnithine                 | methyl glucopyranoside (alpha + beta) | 57.85       |
| 4-guanidinobutanoate                  | pyrraline                             | 53.39       |
| S-allylcysteine                       | thymol sulfate                        | 50.99       |
| trigonelline (N'-methylnicotinate)    | 3-hydroxypyridine sulfate             | 50.85       |
| 3-hydroxypyridine sulfate             | vanillic alcohol sulfate              | 48.14       |
| cis-4-decenoylcarnitine (C10:1)       | 3,4-methyleneheptanoate               | 38.64       |
| perfluorooctanesulfonic acid (PFOS)   | eugenol sulfate                       | 38.57       |
| <b>Asthma</b>                         | vanillic alcohol sulfate              | 38.49       |
| glucose                               | maltose                               | 37.16       |
| beta-cryptoxanthin                    | N-methylproline                       | 35.85       |
| vanillic alcohol sulfate              | theobromine                           | 35.5        |
| o-cresol sulfate                      | eugenol sulfate                       | 34.86       |
| catechol sulfate                      | 3-(3-hydroxyphenyl)propionate         | 31.11       |
| <b>Asthma</b>                         | theobromine                           | 29.77       |
| <b>Asthma</b>                         | eugenol sulfate                       | 28.86       |
| maltose                               | glycerophosphoinositol                | 28.26       |
| <b>Asthma</b>                         | 3,4-methyleneheptanoate               | 28.22       |
| N-delta-acetylnithine                 | trigonelline (N'-methylnicotinate)    | 26.9        |

Table S2: *cont*

| Source Node                                          | Sink Node                             | Edge Weight |
|------------------------------------------------------|---------------------------------------|-------------|
| <b>Asthma</b>                                        | N-methylproline                       | 25.62       |
| 1-methylnicotinamide                                 | theobromine                           | 25.61       |
| succinylcarnitine (C4)                               | ergothioneine                         | 25.54       |
| N-acetylproline                                      | pyrraline                             | 24.37       |
| glucose                                              | guanosine                             | 24.08       |
| 3-carboxy-4-methyl-5-propyl-2-furanpropanoate (CMPF) | 3-methylhistidine                     | 23.95       |
| <b>Asthma</b>                                        | 2,3-dihydroxyisovalerate              | 22.52       |
| catechol sulfate                                     | 3-hydroxypyridine sulfate             | 21.52       |
| N6,N6,N6-trimethyllysine                             | S-allylcysteine                       | 21.33       |
| <b>Asthma</b>                                        | methyl glucopyranoside (alpha + beta) | 21.25       |
| ferulic acid 4-sulfate                               | umbelliferone sulfate                 | 20.72       |
| citrulline                                           | umbelliferone sulfate                 | 20.36       |
| 1-linoleoylglycerol (18:2)                           | thymol sulfate                        | 20.06       |
| 1-methylhistidine                                    | N6,N6,N6-trimethyllysine              | 19.53       |
| beta-cryptoxanthin                                   | ferulic acid 4-sulfate                | 18.96       |
| isobutyrylcarnitine (C4)                             | 3,4-methyleneheptanoate               | 18.85       |
| <b>Asthma</b>                                        | pyrraline                             | 18.35       |
| fructose                                             | vanillic alcohol sulfate              | 16.48       |
| <b>Asthma</b>                                        | S-allylcysteine                       | 16.35       |
| <b>Asthma</b>                                        | umbelliferone sulfate                 | 15.94       |
| <b>Asthma</b>                                        | 3-methylhistidine                     | 15.66       |
| <b>Asthma</b>                                        | thymol sulfate                        | 15.5        |
| ergothioneine                                        | beta-cryptoxanthin                    | 15.08       |
| <b>Asthma</b>                                        | ergothioneine                         | 14.79       |
| trigonelline (N'-methylnicotinate)                   | S-allylcysteine                       | 14.71       |
| glucose                                              | fructose                              | 13.56       |
| <b>Asthma</b>                                        | guanosine                             | 13.56       |
| 4-hydroxyhippurate                                   | catechol sulfate                      | 12.22       |
| N-delta-acetylorlornithine                           | 4-hydroxyhippurate                    | 11.31       |
| <b>Asthma</b>                                        | 3-(3-hydroxyphenyl)propionate         | 8.15        |

The starting node is known as the “Source” and the node the edge points to is known as the “sink”

**Figure S1: Hold-out testing of PLS-DA and BN models**

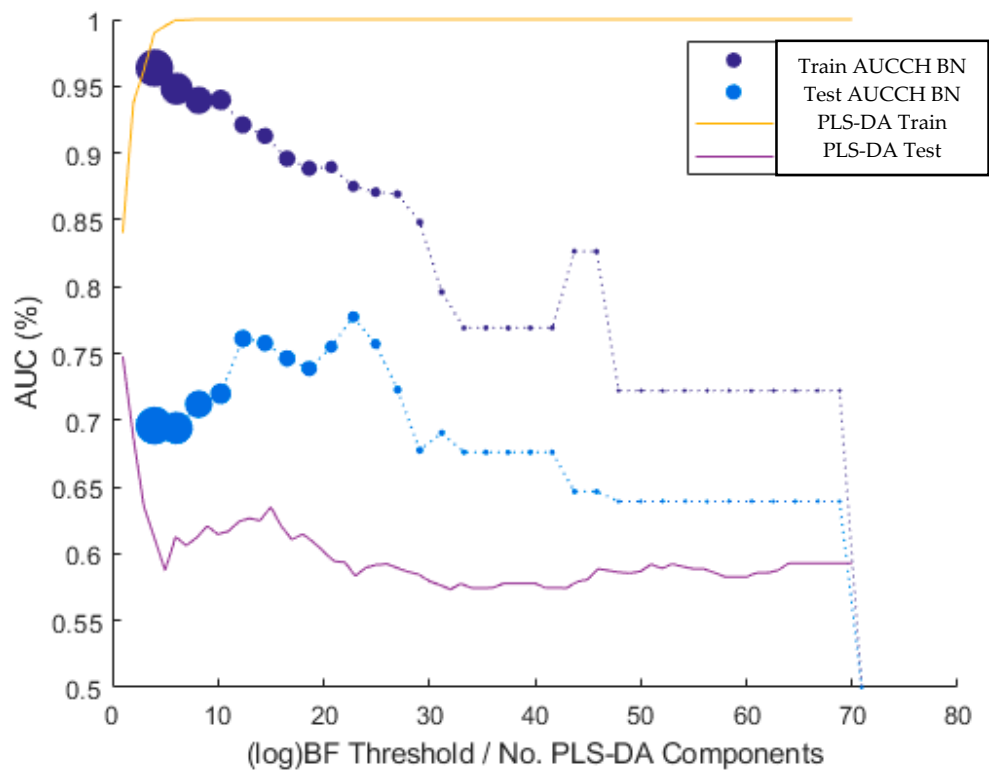

Data were split into a hold-out testing set (33%) and a training set (67%). PLS-DA was trained on the training set for each possible number of components, 1 to 70. Components are plotted along the x-axis. PLS-DA prediction on the testing set is measured in AUCCH and shown in purple. CGBNs were learned on the training set using different edge thresholds (log Bayes Factors, BF) for including edges in the network. Training performance and testing performance are shown for each BN, with total network size proportional to the size of the dot. BFs and Number of PLS-DA components are shown on the same axis, in the same direction.

**Figure S2: Cross Validation of accuracy of PLS-DA and Bayesian Network for Asthma in VDAART**

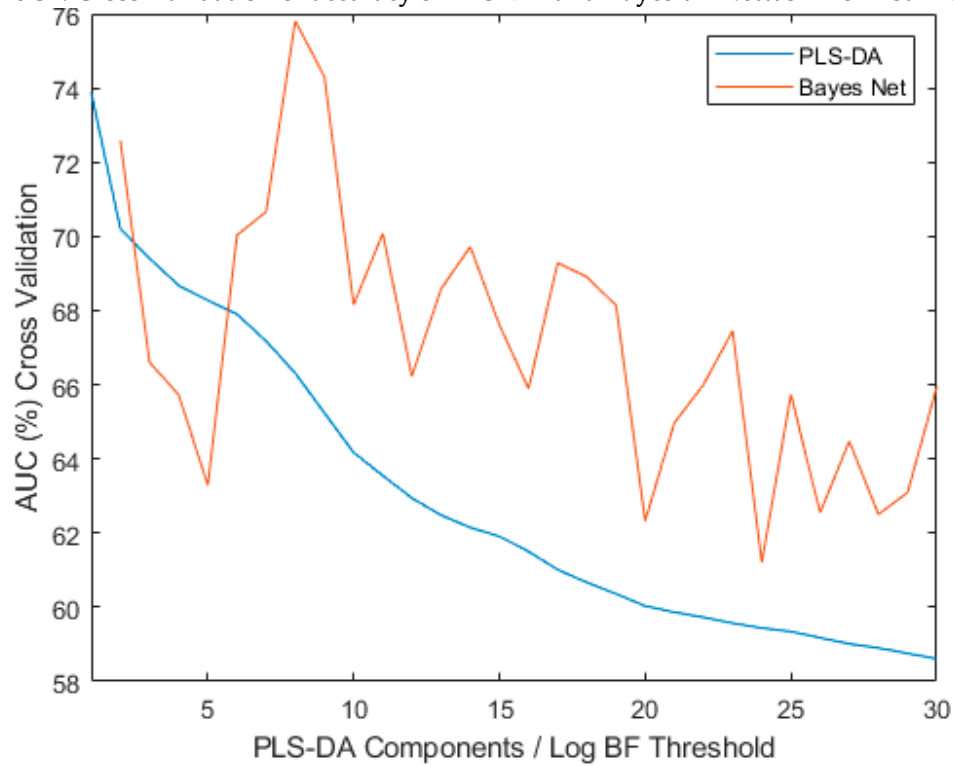

Using five-fold cross validation, Bayesian Networks and PLS-DA were assessed using different edge-threshold inclusion parameters (in log Bayes Factor, BF), and PLS-DA components, shown on the x-axis.

**Figure S3: Permutation test of 1 PLS-DA Component. AUCCH=0.810,  $p=0.057$**

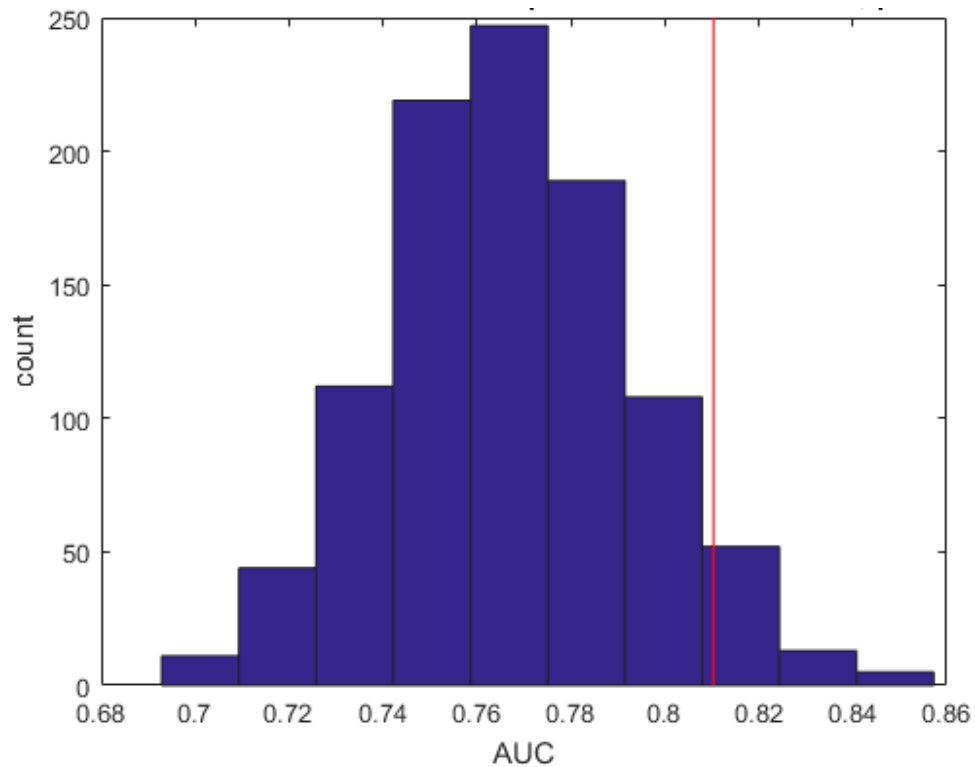

The empirical distribution of possible AUCCHs for PLS-DA models with 1 component from 1000 random realizations of the VDAART data, with the asthma status (case / control) randomly permuted in each. The AUCCH of the 1-component PLS-DA model on the true data is shown as a red line. This test indicates a small likelihood of obtaining similar accuracy by chance ( $p = 0.057$ ).

**Figure S4: Permutation test of Bayesian Network; AUCCH=0.92,  $p < 0.001$**

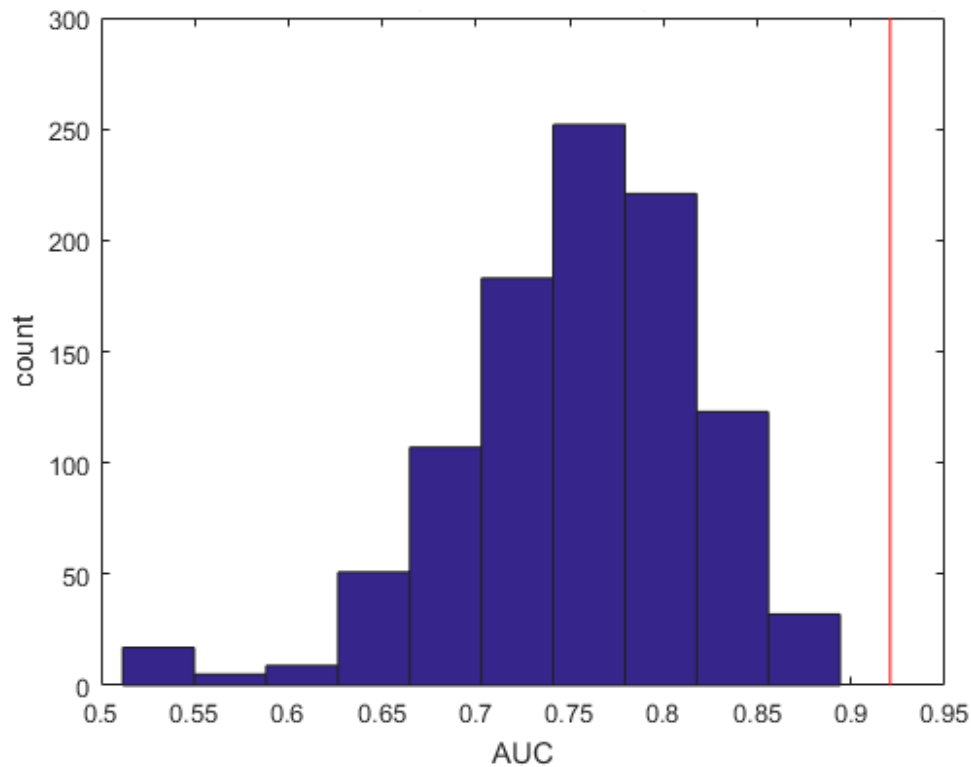

The empirical distribution of possible AUCCHs for Bayesian Network models from 1000 random realizations of the VDAART data, with the asthma status (case / control) randomly permuted in each. The AUCCH of the BN model on the true data is shown as a red line (AUCCH = 0.92). This test indicates a very small likelihood of obtaining similar accuracy by chance ( $p < 0.001$ ).



**Figure S5 VDAART Metabolite Asthma Prediction by BN (AUCCH=0.926) and PLS-DA (AUCCH=0.803) including Race**

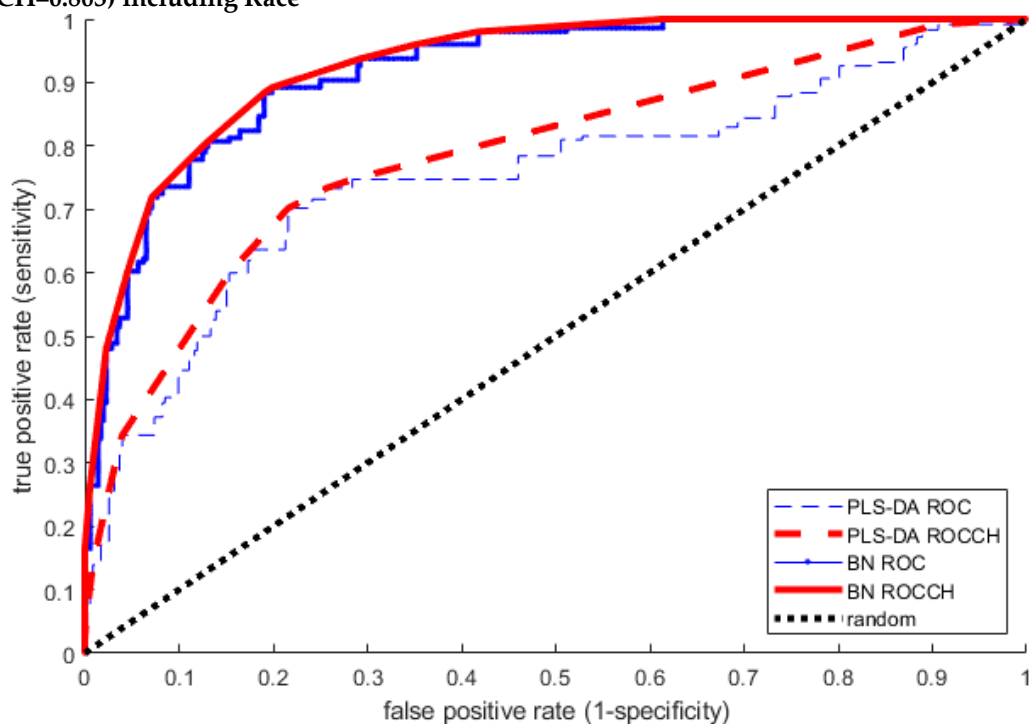

The Discrimination of asthma at age three based on plasma metabolomic profiles by PLS-DA (AUCCH=0.803) and by Bayesian network (AUCCH=0.926) including Race on the full dataset. AUCCH- Area under the curve convex hull. BN – Bayesian Network. ROC – Receiver Operator Characteristic curve  
ROCCH – ROC Convex Hull.
